**SHORT COMMUNICATION**  
**DICYCLOHEXYLCARBODIIMIDE REACTS SPECIFICALLY**  
**WITH THE 16kDa SUBUNIT OF LARVAL *MANDUCA SEXTA***  
**MIDGUT VACUOLAR-TYPE ATPase**

BY X. Y. ZHENG, D. D. SPAETH, W. R. HARVEY  
AND M. G. WOLFERSBERGER

*Department of Biology, Temple University, Philadelphia, PA, USA*

*Accepted 11 December 1991*

Proton-motive vacuolar-class ATPases (V-ATPases) are commonly associated with membrane-bound organelles other than mitochondria and chloroplasts. They are found in the vacuoles of *Neurospora crassa* and yeasts, in tonoplasts of plants and in endomembranes such as lysosomes, endosomes, clathrin-coated vesicles and secretory granules (Sze, 1985; Rudnick, 1986; Mellman *et al.* 1986; Rodman *et al.* 1991). However, they have also been found in plasma membranes of kidney tubules (Brown *et al.* 1987; Wang and Gluck, 1990). Recently, the pump responsible for the large lumen-directed net flux of potassium across larval *Manduca sexta* midgut has been shown to consist of a plasma membrane proton-motive V-ATPase functioning in conjunction with an  $nH^+/K^+$  antiporter (Wieczorek *et al.* 1991).

Purification of V-ATPases from native membranes has shown that these enzymes consist of several polypeptides, ranging in molecular mass from approximately 116 kDa to 15 kDa (Forgac, 1989). The holoenzymes range from 300 kDa to 600 kDa and thus, like F-ATPases, V-ATPases are multipolypeptide complexes. There is considerable diversity in the subunit composition of V-ATPases. However, there is a general consensus that three polypeptides, of approximately 70 kDa, 60 kDa and 16 kDa, are always present (Stone *et al.* 1989). The V-ATPase of *M. sexta* midgut contains major subunits of approximately 67 kDa, 56 kDa, 43 kDa, 28 kDa and 16 kDa (Schweikl *et al.* 1989).

V-ATPases are distinguished from P-ATPases and F-ATPases by their sensitivity to various inhibitors. V-ATPases are resistant to the P-ATPase inhibitor vanadate and to classic F-ATPase inhibitors such as oligomycin and azide. In contrast, the V-ATPases are highly sensitive to bafilomycin (Bowman *et al.* 1988; Wieczorek *et al.* 1991) and inhibited by sulfhydryl-alkylating agents such as *N*-ethylmaleimide and 7-chloro-4-nitro-benz-2-oxa-1,3-diazole (Forgac, 1989). In general, V-ATPases are inhibited by *N,N'*-dicyclohexylcarbodiimide (DCCD) concentrations approximately an order of magnitude higher than those required to inhibit F-ATPases but an order of magnitude lower than those required to inhibit P-ATPases (Forgac, 1989).

Key words: DCCD, *Manduca sexta*, midgut, V-ATPase.

The functions of different V-ATPase subunits are not yet completely known. Studies performed with [ $^{14}\text{C}$ ]DCCD reveal that the 17 kDa subunit of several V-ATPases is predominantly labeled (Sutton and Apps, 1981; Bowman, 1983; Manolson *et al.* 1985; Uchida *et al.* 1985; Mandala and Taiz, 1986; Arai *et al.* 1987; Kaestner *et al.* 1988; Jehmlich *et al.* 1991). Based upon an analogy with mitochondrial F-ATPase, there has been speculation that this component is similar to  $\text{F}_0$ , which is also labeled with [ $^{14}\text{C}$ ]DCCD, and that it is part of the transmembrane proton-conducting sector of the mitochondrial enzyme.

The aim of the following investigation was to use DCCD to identify the putative proton translocation subunit and thereby tentatively to assign a function to one of the individual subunits of the V-ATPase in the apical membrane of the larval midgut goblet cells of the tobacco hornworm *Manduca sexta*.

Unless noted otherwise, all chemicals were purchased from either Sigma (St Louis, MO) or Fisher Scientific (Pittsburgh, PA). *M. sexta* eggs and larval diet were purchased from Carolina Biological Supply (Burlington, NC). The larvae were raised to the fifth instar,  $5.0 \pm 0.5$  g, at  $27^\circ\text{C}$  with constant light. Midgut goblet cell apical membrane V-ATPase was prepared as described by Wieczorek *et al.* (1990) from the fifth-instar larvae. Enzyme concentration was determined by the Amido Black method of Popov *et al.* (1975) as modified and described by Wieczorek *et al.* (1990).

ATPase activity was assayed by determining the amount of released inorganic phosphate (Wieczorek *et al.* 1990). The incubation mixture for ATPase activity assays contained approximately  $0.5\ \mu\text{g}$  of purified ATPase protein,  $1\ \text{mmol l}^{-1}$   $\text{MgCl}_2$ ,  $1\ \text{mmol l}^{-1}$  Tris-ATP,  $20\ \text{mmol l}^{-1}$  KCl,  $50\ \text{mmol l}^{-1}$  Tris-Mops,  $0.1\ \text{mmol l}^{-1}$  EDTA,  $3\ \text{mmol l}^{-1}$  2-mercaptoethanol and 0.003 %  $\text{C}_{12}\text{E}_{10}$  (polyoxyethylene 10 lauryl ether). Incubation mixtures, prepared in triplicate, had a total volume of 0.16 ml and a pH of 8.1. The mixtures were pre-incubated in the absence of the substrate for 5–20 min at  $30^\circ\text{C}$ . Assays were started by adding ATP and were incubated for 5 min. Under these conditions, release of inorganic phosphate was a linear function of enzyme concentration and of incubation time. Reactions were stopped by placing the assay tubes in liquid nitrogen.

The reaction mixtures for measuring the inhibition of ATPase activity by DCCD were similar to those for measuring enzyme activity except for the addition of specific concentrations ( $0$ – $1.5\ \text{mmol l}^{-1}$ ) of DCCD. Concentrated DCCD solutions were prepared in dimethylformamide (DMF). Concentrations of DMF up to 2 % had no effect on enzyme activity. All reaction mixtures to test the effects of DCCD contained less than 2 % DMF.

The midgut ATPase was labeled with [ $^{14}\text{C}$ ]DCCD by incubating purified enzyme ( $15\ \mu\text{g ml}^{-1}$ ) with  $10\ \mu\text{mol l}^{-1}$  or  $100\ \mu\text{mol l}^{-1}$  *N,N'*-dicyclohexyl[ $^{14}\text{C}$ ]carbodiimide ( $50$ – $60\ \text{Ci mol}^{-1}$ ; Amersham, Arlington Heights, IL) in  $1\ \text{mmol l}^{-1}$   $\text{MgCl}_2$ ,  $20\ \text{mmol l}^{-1}$  KCl,  $50\ \text{mmol l}^{-1}$  Tris-Mops (pH 8.1),  $0.1\ \text{mmol l}^{-1}$  EDTA,  $1\ \text{mmol l}^{-1}$  2-mercaptoethanol and 0.003 %  $\text{C}_{12}\text{E}_{10}$  for 10 min at  $30^\circ\text{C}$ . Reactions were stopped by placing the assay tubes in liquid nitrogen.

Radioactive DCCD-treated ATPase was precipitated with trichloroacetic acid

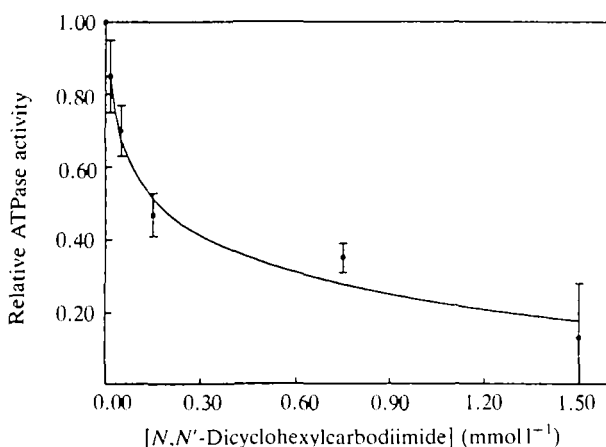

Fig. 1. Activity of solubilized midgut V-ATPase versus *N,N'*-dicyclohexylcarbodiimide concentration. Assay conditions are described in the text. Mean values with S.E.M. error bars from three independent assays are shown.

(final concentration 10 %) and washed twice with acetone. The pellets were air dried and prepared for SDS–polyacrylamide gel electrophoresis (Laemmli, 1970) by resuspension in sample buffer (0.125 mol l<sup>-1</sup> Tris–HCl, pH 6.8; 4 % SDS; 20 % glycerol; 10 % 2-mercaptoethanol) with 2 min of heating in boiling water. 0.75 mm thick 15 % gels were run at 25 mA constant current until the solvent front was close to the bottom of the gel. Gels were incubated in transferring buffer (25 mmol l<sup>-1</sup> Tris, 192 mmol l<sup>-1</sup> glycine, 15 % methanol, pH 8.2–8.3) for 20–30 min. The gel and wet Immobilon membrane (Millipore, Bedford, MA) were sandwiched between sheets of absorbent filter paper wetted with transferring buffer. The sandwich was placed in the cassette of a BioRad (Richmond, CA) transblot apparatus and transferred at 40 V and 4°C for 5–15 h. The membrane was dried in air overnight. Membranes were exposed to Kodak X-OMAT film for 2–4 weeks at –70°C.

A dose–response curve for the effect of DCCD on ATPase activity is shown in Fig. 1. When the DCCD concentration is 0.15 mmol l<sup>-1</sup>, enzyme activity is inhibited by 50 %. At a DCCD concentration of 1.5 mmol l<sup>-1</sup>, enzyme activity is less than 20 % of that in the absence of DCCD.

The 16 kDa subunit of *M. sexta* midgut V-ATPase is labeled heavily in the presence of 10 µmol l<sup>-1</sup> [<sup>14</sup>C]DCCD (approximately 37 µCi mg<sup>-1</sup> enzyme). When the labeling mixture contains 100 µmol l<sup>-1</sup> [<sup>14</sup>C]DCCD (approximately 367 µCi mg<sup>-1</sup> enzyme), labeling of the 16 kDa subunit is similar to that obtained with 10 µmol l<sup>-1</sup> DCCD, but most other ATPase subunits are also labeled (Fig. 2).

In this study, solubilized *M. sexta* midgut V-ATPase was labeled specifically in the presence of 10 µmol l<sup>-1</sup> DCCD and its catalytic activity was inhibited significantly in the presence of 15 µmol l<sup>-1</sup> DCCD. However, 150 µmol l<sup>-1</sup> DCCD was required for 50 % inhibition and even 1.5 mmol l<sup>-1</sup> DCCD did not consistently

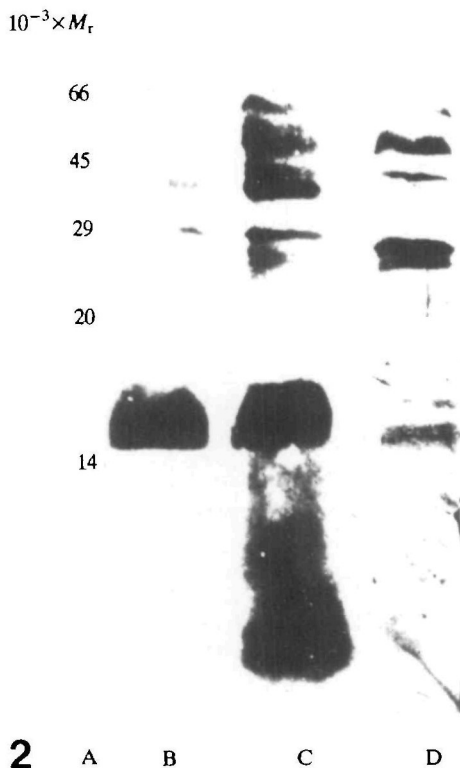

Fig. 2. Labeling of midgut V-ATPase subunits by *N,N'*-dicyclohexylcarbodiimide (DCCD). Lane A, positions of standard proteins. Lane B,  $10 \mu\text{mol l}^{-1}$  [ $^{14}\text{C}$ ]DCCD. Lane C,  $100 \mu\text{mol l}^{-1}$  [ $^{14}\text{C}$ ]DCCD. Lane D, blot of ATPase stained for protein.

inhibit enzyme activity completely. Two previous studies have determined the effects of  $1.5 \mu\text{mol l}^{-1}$  and  $150 \mu\text{mol l}^{-1}$  DCCD on midgut goblet cell apical membrane ATPase. In the study of Wieczorek *et al.* (1986),  $1.5 \mu\text{mol l}^{-1}$  and  $150 \mu\text{mol l}^{-1}$  DCCD were found to inhibit the activity of highly purified membrane-bound enzyme by 6 % and 94 %, respectively. In the study of Schweikl *et al.* (1989), no inhibition of membrane-bound ATPase activity and 81 % inhibition of solubilized ATPase activity were found in the presence of  $1.5 \mu\text{mol l}^{-1}$  DCCD, whereas 93 % inhibition of membrane-bound ATPase activity and 95 % inhibition of solubilized ATPase activity were found in the presence of  $150 \mu\text{mol l}^{-1}$  DCCD. Differences between the inhibitor sensitivities of membrane-bound and detergent-solubilized forms of the same enzyme are not unusual (Uchida *et al.* 1985; Arai *et al.* 1987). However, the large difference between the DCCD sensitivity of the solubilized midgut V-ATPase found in the present study and that reported by Schweikl *et al.* (1989) is unusual. The larvae used in the two studies came from different colonies but the methods of enzyme purification were the same. The assays of enzyme activity were also the same in both studies except that in the present studies concentrated DCCD stock solutions were prepared in DMF and

assay mixtures were incubated for 5 min, whereas Schweikl *et al.* (1989) prepared concentrated DCCD stock solutions in ethanol and incubated their assay mixtures for 12 min. The amount of ATP hydrolysed did not increase linearly with time in the assays of Schweikl *et al.* (1989). Furthermore, both sodium azide and sodium orthovanadate were present in the assay mixtures used by Schweikl *et al.* (1989) but not in those used in the present study.

Specific binding of DCCD to the 16 kDa subunit of midgut V-ATPase is shown clearly in Fig. 2. Although DCCD can interact with carboxyl groups, sulfhydryl groups and tyrosine residues, it usually forms covalent bonds with hydrophobically located carboxyl groups, such as those on glutamate and aspartate residues in transmembrane domains (Nalecz *et al.* 1986). DCCD blocks proton translocation through  $F_0$  by reacting with the c-subunit at a single glutamic acid or aspartic acid carboxyl group in F-type ATPases (Sebald *et al.* 1979, 1980; Schneider and Altendorf, 1987). Reaction of DCCD with midgut V-ATPase is quite specific for the 16 kDa subunit. The similarities between the 16 kDa subunit of several V-ATPases and the 8 kDa subunit of mitochondrial, chloroplast and bacterial F-ATPases are striking (Wang and Sze, 1985). The findings reported in this communication suggest that the 16 kDa subunit of midgut V-ATPase may be involved in forming the transmembrane proton-conducting pore of this proton-motive ATPase.

This research was supported in part by NIH Grant AI-22444.

### References

- ARAI, H., BERNE, M. AND FORGAC, M. (1987). Inhibition of the coated vesicle proton pump and labeling of a 17,000-Dalton polypeptide by *N,N'*-dicyclohexylcarbodiimide. *J. biol. Chem.* **262**, 11006–11011.
- BOWMAN, E. J. (1983). Comparison of the vacuolar membrane ATPase of *Neurospora crassa* with the mitochondrial and plasma membrane ATPases. *J. biol. Chem.* **258**, 15238–15244.
- BOWMAN, E. J., SIEBERS, A. AND ALTENDORF, K. (1988). Bafilomycins: A class of inhibitors of membrane ATPases from microorganisms, animal cells, and plant cells. *Proc. natn. Acad. Sci. U.S.A.* **85**, 7972–7976.
- BROWN, D., GLUCK, S. AND HARTWIG, J. (1987). Structure of the novel membrane-coating material in proton-secreting epithelial cells and identification as an  $H^+$  ATPase. *J. Cell Biol.* **105**, 1637–1648.
- FORGAC, M. (1989). Structure and function of vacuolar class ATP-driven proton pumps. *Physiol. Rev.* **69**, 765–796.
- JEHMLICH, K., SABLITNI, J., SIMON, B. AND BURCKHARDT, G. (1991). Biochemical aspects of  $H^+$ -ATPase in renal proximal tubules: inhibition by *N,N'*-dicyclohexylcarbodiimide, *N*-ethylmaleimide, and bafilomycin. *Kidney Int.* **40**, S64–S70.
- KAESTNER, K. H., RANDALL, H. S. AND SZE, H. (1988). DCCD-binding proteolipid of the vacuolar  $H^+$ -ATPase from oat roots. *J. biol. Chem.* **263**, 1282–1287.
- LAEMMLI, U. K. (1970). Cleavage of structural protein during assembly of the head of bacteriophage T4. *Nature* **227**, 19236–19244.
- MANDALA, S. AND TAIZ, L. (1986). Characterization of the subunit structure of the maize tonoplast ATPase. *J. biol. Chem.* **261**, 12850–12855.
- MANOLSON, M. F., REA, P. A. AND POOLE, R. J. (1985). Identification of BzATP and DCCD-binding subunits of a higher plant  $H^+$ -translocating ATPase. *J. biol. Chem.* **260**, 12273–12279.

- MELLMAN, I., FUCHS, R. AND HELENIUS, A. (1986). Acidification of the endocytic and exocytic pathways. *A. Rev. Biochem.* **55**, 663–700.
- NALECZ, M. J., CASEY, R. P. AND AZZI, A. (1986). Use of *N,N'*-dicyclohexylcarbodiimide to study membrane-bound enzymes. *Meth. Enzymol.* **125**, 86–108.
- POPOV, N., SCHULZECK, S. AND MATTHIES, H. (1975). Eine störungsfreie Mikronmethode zur Bestimmung des Proteingehaltes in Gewebehomogenaten. *Acta Biol. Med. Ger.* **34**, 1441–1446.
- RODMAN, S. J., STAHL, P. D. AND GLUCK, S. (1991). Distribution and structure of the vacuolar  $H^+$ -ATPase in endosomes and lysosomes from LLC-PK1 Cells. *Expl Cell Res.* **192**, 445–452.
- RUDNICK, G. (1986). ATP-driven  $H^+$  pumping into intracellular organelles. *A. Rev. Physiol.* **48**, 403–413.
- SCHNEIDER, E. AND ALTENDORF, K. (1987). Bacterial ATP synthetase ( $F_1F_0$ ):Purification and reconstitution of  $F_0$  complexes and biochemical and functional characterization of their subunits. *Microbiol. Rev.* **51**, 477–497.
- SCHWEIKL, H., KLEIN, U., SCHINDLBECK, M. AND WIECZOREK, H. (1989). A vacuolar-type ATPase partially purified from potassium transporting plasma membranes of tobacco hornworm midgut. *J. biol. Chem.* **264**, 11 136–11 142.
- SEBALD, W., GRAF, T. AND LUNKINS, H. B. (1979). The DCCD-binding protein of the mitochondrial ATPase complex from *N. crassa* and *S. cerevisiae*. *J. Biochem., Tokyo* **93**, 587–599.
- SEBALD, W., MACHLEIDT, W. AND WACHTER, E. (1980). DCCD binds specifically a single glutamyl residue of the proteolipid subunit of the mitochondrial ATPases from *N. crassa* and *S. cerevisiae*. *Proc. natn. Acad. Sci. U.S.A.* **77**, 785–789.
- STONE, D. K., CRIDER, B. P., SUDHOF, T. C. AND XIE, X. S. (1989). Vacuolar proton pumps. *J. Bioenerg. Biomemb.* **21**, 605–620.
- SUTTON, R. AND APPS, D. K. (1981). Isolation of a DCCD-binding protein from bovine chromaffin granule membranes. *FEBS Lett.* **130**, 103–106.
- SZE, H. (1985).  $H^+$ -translocating ATPases: Advances using membrane vesicles. *A. Rev. Plant Physiol.* **36**, 175–208.
- UCHIDA, A. S., OHSUMI, Y. AND ANRAKU, Y. (1985). Characterization and function of catalytic subunit of a  $H^+$ -translocating ATPase from vacuolar membranes of *S. cerevisiae*. *J. biol. Chem.* **263**, 45–51.
- WANG, Y. AND SZE, Z. (1985). Similarities and differences between the tonoplast-type and the mitochondrial  $H^+$ -ATPases of oat roots. *J. biol. Chem.* **260**, 10 434–10 443.
- WANG, Z.-Q. AND GLUCK, S. (1990). Isolation and properties of bovine kidney brush border vacuolar  $H^+$ -ATPase. *J. biol. Chem.* **265**, 21 957–21 965.
- WIECZOREK, H., CIOFFI, M., KLEIN, U., HARVEY, W. R., SCHWEIKL, H. AND WOLFERSBERGER, M. G. (1990). Isolation of the goblet cell apical membrane from tobacco hornworm midgut and purification of its vacuolar-type ATPase. *Meth. Enzymol.* **192**, 608–616.
- WIECZOREK, H., PUTZENLECHNER, M., ZEISKE, W. AND KLEIN, U. (1991). A vacuolar-type proton pump energizes  $K^+/H^+$ -antiport in an animal plasma membrane. *J. biol. Chem.* **266**, 15 340–15 347.
- WIECZOREK, H., WOLFERSBERGER, M. G., CIOFFI, M. AND HARVEY, W. R. (1986). Cation-stimulated ATPase activity in purified plasma membranes from tobacco hornworm midgut. *Biochim. biophys. Acta* **857**, 271–281.
